# Supplementary material
Source: MDPI journal article supplement (https://www.mdpi.com/2073-4433/15/8/1004)
Supplement: s1 [file s1]

# Supplementary Materials: Elucidating Decade-Long Trends and Diurnal Patterns in Aerosol Acidity in Shanghai

Zhixiao Lv <sup>1</sup>, Xingnan Ye <sup>1,\*</sup>, Weijie Huang <sup>1</sup>, Yinghui Yao <sup>1</sup> and Yusen Duan <sup>2</sup>

<sup>1</sup> Shanghai Key Laboratory of Atmospheric Particle Pollution and Prevention (LAP3), National Observations and Research Station for Wetland Ecosystems of the Yangtze Estuary, Department of Environmental Science and Engineering, Fudan University, Shanghai 200438, China; 21210740069@m.fudan.edu.cn (Z.L.); 21110740007@m.fudan.edu.cn (W.H.); 19110740008@fudan.edu.cn (Y.Y.)

<sup>2</sup> Shanghai Environmental Monitoring Center, Shanghai 200235, China; duanys@sheemc.cn

\* Correspondence: yexingnan@fudan.edu.cn

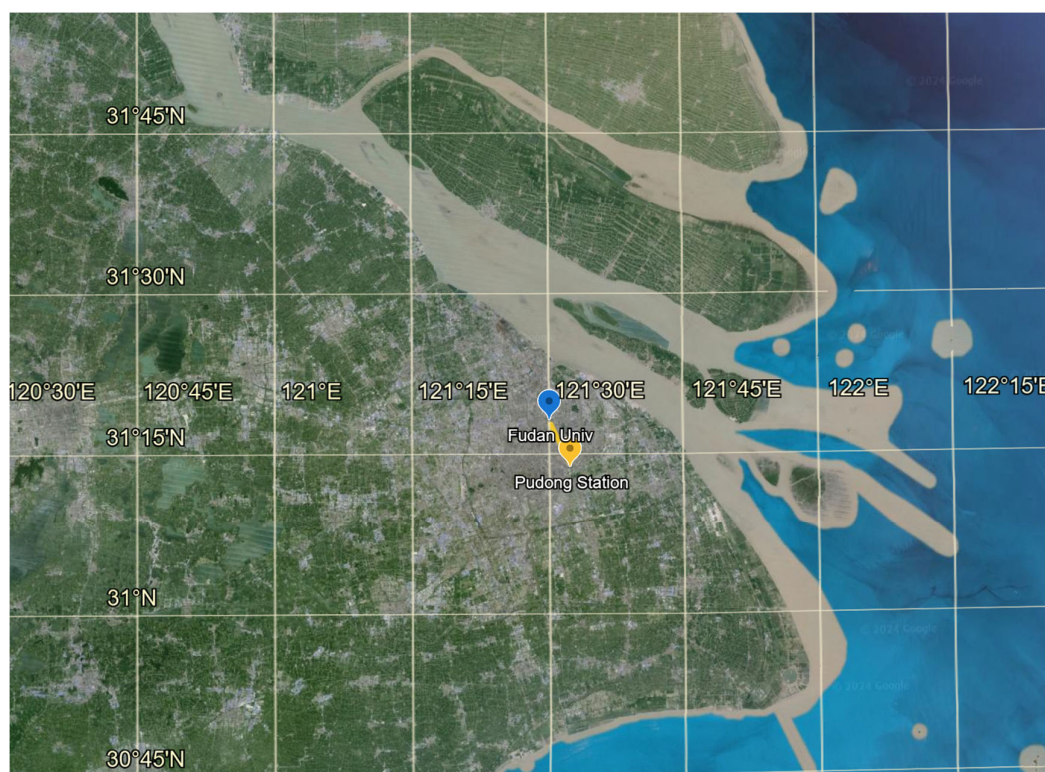

**Figure S1.** Geographical location of the sampling sites.

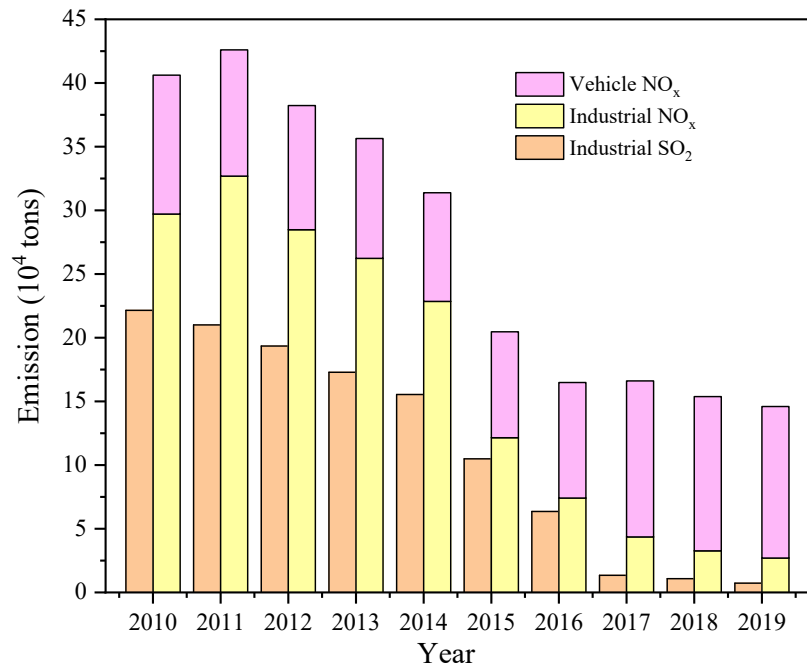

**Figure S2.** Annual variation of SO<sub>2</sub> and NO<sub>x</sub> emissions. The data is from the China Statistical Year-book on Environment, 2011–2021 and partly from ABaCAS-EI v2.0.

**Table S1.** Aerosol pH of 2010–2020 with seasonal mean values input.

| Summer    |                 |                               |                  |                  |       |                  |                |                  |      |        |      |
|-----------|-----------------|-------------------------------|------------------|------------------|-------|------------------|----------------|------------------|------|--------|------|
| Year      | Na <sup>+</sup> | SO <sub>4</sub> <sup>2-</sup> | TNH <sub>3</sub> | TNO <sub>3</sub> | TCl   | Ca <sup>2+</sup> | K <sup>+</sup> | Mg <sup>2+</sup> | RH   | T      | pH   |
| 2010      | 0.362           | 9.610                         | 12.480           | 7.153            | 1.775 | 0.823            | 0.385          | 0.091            | 0.75 | 301.00 | 2.97 |
| 2012–2013 | 0               | 7.120                         | 12.827           | 2.699            | 1.489 | 1.275            | 0.335          | 0.273            | 0.76 | 302.54 | 3.37 |
| 2014      | 0.236           | 10.784                        | 13.578           | 8.965            | 0.590 | 0.082            | 0.849          | 0.061            | 0.80 | 298.95 | 2.97 |
| 2015      | 0.334           | 11.039                        | 15.622           | 7.794            | 1.542 | 0.350            | 1.106          | 0.057            | 0.78 | 299.58 | 3.05 |
| 2016      | 0.041           | 6.836                         | 11.468           | 5.156            | 0.450 | 0.084            | 0.022          | 0.019            | 0.78 | 301.32 | 2.59 |
| 2017      | 0.105           | 6.652                         | 12.651           | 5.102            | 0.623 | 0.093            | 0.065          | 0.017            | 0.74 | 302.16 | 2.54 |
| 2018      | 0.135           | 6.016                         | 7.758            | 3.953            | 0.554 | 0.042            | 0.054          | 0.021            | 0.78 | 301.10 | 2.35 |
| 2019      | 0.105           | 6.230                         | 9.787            | 4.917            | 0.470 | 0.016            | 0.026          | 0.012            | 0.78 | 300.47 | 2.53 |
| 2020      | 0.216           | 4.750                         | 10.071           | 4.159            | 0.468 | 0.067            | 0.043          | 0.030            | 0.78 | 301.82 | 2.56 |
| Winter    |                 |                               |                  |                  |       |                  |                |                  |      |        |      |
| Year      | Na <sup>+</sup> | SO <sub>4</sub> <sup>2-</sup> | TNH <sub>3</sub> | TNO <sub>3</sub> | TCl   | Ca <sup>2+</sup> | K <sup>+</sup> | Mg <sup>2+</sup> | RH   | T      | pH   |
| 2010      | 0.02            | 8.678                         | 9.493            | 7.162            | 2.420 | 1.695            | 0.766          | 0.254            | 0.76 | 280.80 | 3.96 |
| 2012–2013 | 0               | 12.144                        | 15.003           | 15.556           | 1.959 | 0.295            | 0.702          | 0.024            | 0.73 | 278.64 | 3.95 |
| 2014      | 0.317           | 13.992                        | 15.531           | 17.354           | 2.644 | 0.242            | 1.516          | 0.087            | 0.70 | 279.55 | 3.76 |
| 2015      | 0.274           | 13.520                        | 15.732           | 19.371           | 2.418 | 0.240            | 1.370          | 0.070            | 0.72 | 279.84 | 3.75 |
| 2016      | 0.198           | 9.931                         | 11.625           | 14.094           | 1.639 | 0.128            | 0.433          | 0.036            | 0.71 | 280.80 | 3.50 |
| 2017      | 0.054           | 10.008                        | 12.344           | 17.244           | 1.842 | 0.064            | 0.282          | 0.024            | 0.72 | 278.86 | 3.58 |
| 2018      | 0.231           | 7.586                         | 9.510            | 12.921           | 1.482 | 0.138            | 0.311          | 0.036            | 0.75 | 279.86 | 3.51 |
| 2019      | 0.147           | 7.405                         | 10.412           | 12.965           | 1.268 | 0.109            | 0.389          | 0.030            | 0.74 | 281.75 | 3.51 |
| 2020      | 0.179           | 8.211                         | 10.146           | 12.669           | 1.344 | 0.108            | 0.462          | 0.037            | 0.73 | 281.45 | 3.45 |

**Table S2.** Aerosol pH of 2010–2020 with seasonal mean values input except for Ca<sup>2+</sup>.

| Summer    |                 |                               |                  |                  |       |                  |                |                  |      |        |       |
|-----------|-----------------|-------------------------------|------------------|------------------|-------|------------------|----------------|------------------|------|--------|-------|
| Year      | Na <sup>+</sup> | SO <sub>4</sub> <sup>2-</sup> | TNH <sub>3</sub> | TNO <sub>3</sub> | TCl   | Ca <sup>2+</sup> | K <sup>+</sup> | Mg <sup>2+</sup> | RH   | T      | pH    |
| 2010      | 0.362           | 9.610                         | 12.480           | 7.153            | 1.775 | 0                | 0.385          | 0.091            | 0.75 | 301.00 | 2.760 |
| 2012–2013 | 0               | 7.120                         | 12.827           | 2.699            | 1.489 | 0                | 0.335          | 0.273            | 0.76 | 302.54 | 2.930 |
| 2014      | 0.236           | 10.784                        | 13.578           | 8.965            | 0.590 | 0                | <b>0.849</b>   | 0.061            | 0.80 | 298.95 | 2.962 |
| 2015      | 0.334           | 11.039                        | 15.622           | 7.794            | 1.542 | 0                | 1.106          | 0.057            | 0.78 | 299.58 | 3.006 |
| 2016      | 0.041           | 6.836                         | 11.468           | 5.156            | 0.450 | 0                | 0.022          | 0.019            | 0.78 | 301.32 | 2.583 |
| 2017      | 0.105           | 6.652                         | 12.651           | 5.102            | 0.623 | 0                | 0.065          | 0.017            | 0.74 | 302.16 | 2.527 |
| 2018      | 0.135           | 6.016                         | 7.758            | 3.953            | 0.554 | 0                | 0.054          | 0.021            | 0.78 | 301.10 | 2.346 |
| 2019      | 0.105           | 6.230                         | 9.787            | 4.917            | 0.470 | 0                | 0.026          | 0.012            | 0.78 | 300.47 | 2.534 |
| 2020      | 0.216           | 4.750                         | 10.071           | 4.159            | 0.468 | 0                | <b>0.043</b>   | 0.030            | 0.78 | 301.82 | 2.589 |
| Winter    |                 |                               |                  |                  |       |                  |                |                  |      |        |       |
| Year      | Na <sup>+</sup> | SO <sub>4</sub> <sup>2-</sup> | TNH <sub>3</sub> | TNO <sub>3</sub> | TCl   | Ca <sup>2+</sup> | K <sup>+</sup> | Mg <sup>2+</sup> | RH   | T      | pH    |
| 2010      | 0.02            | 8.678                         | 9.493            | 7.162            | 2.420 | 0                | 0.766          | 0.254            | 0.76 | 280.80 | 2.929 |
| 2012–2013 | 0               | 12.144                        | 15.003           | 15.556           | 1.959 | 0                | 0.702          | 0.024            | 0.73 | 278.64 | 3.720 |
| 2014      | 0.317           | 13.992                        | 15.531           | 17.354           | 2.644 | 0                | <b>1.516</b>   | 0.087            | 0.70 | 279.55 | 3.743 |
| 2015      | 0.274           | 13.520                        | 15.732           | 19.371           | 2.418 | 0                | 1.370          | 0.070            | 0.72 | 279.84 | 3.716 |
| 2016      | 0.198           | 9.931                         | 11.625           | 14.094           | 1.639 | 0                | 0.433          | 0.036            | 0.71 | 280.80 | 3.481 |
| 2017      | 0.054           | 10.008                        | 12.344           | 17.244           | 1.842 | 0                | 0.282          | 0.024            | 0.72 | 278.86 | 3.572 |
| 2018      | 0.231           | 7.586                         | 9.510            | 12.921           | 1.482 | 0                | 0.311          | 0.036            | 0.75 | 279.86 | 3.476 |
| 2019      | 0.147           | 7.405                         | 10.412           | 12.965           | 1.268 | 0                | 0.389          | 0.030            | 0.74 | 281.75 | 3.492 |
| 2020      | 0.179           | 8.211                         | 10.146           | 12.669           | 1.344 | 0                | <b>0.462</b>   | 0.037            | 0.73 | 281.45 | 3.434 |

**Table S3.** Aerosol pH of 2010–2020 with seasonal mean values input except for K<sup>+</sup>.

| Summer    |                 |                               |                  |                  |       |                  |                |                  |      |        |       |
|-----------|-----------------|-------------------------------|------------------|------------------|-------|------------------|----------------|------------------|------|--------|-------|
| Year      | Na <sup>+</sup> | SO <sub>4</sub> <sup>2-</sup> | TNH <sub>3</sub> | TNO <sub>3</sub> | TCl   | Ca <sup>2+</sup> | K <sup>+</sup> | Mg <sup>2+</sup> | RH   | T      | pH    |
| 2010      | 0.362           | 9.610                         | 12.480           | 7.153            | 1.775 | 0.823            | 0              | 0.091            | 0.75 | 301.00 | 2.916 |
| 2012–2013 | 0               | 7.120                         | 12.827           | 2.699            | 1.489 | 1.275            | 0              | 0.273            | 0.76 | 302.54 | 3.242 |
| 2014      | 0.236           | 10.784                        | 13.578           | 8.965            | 0.590 | 0.082            | 0              | 0.061            | 0.80 | 298.95 | 2.894 |
| 2015      | 0.334           | 11.039                        | 15.622           | 7.794            | 1.542 | 0.350            | 0              | 0.057            | 0.78 | 299.58 | 2.942 |
| 2016      | 0.041           | 6.836                         | 11.468           | 5.156            | 0.450 | 0.084            | 0              | 0.019            | 0.78 | 301.32 | 2.590 |
| 2017      | 0.105           | 6.652                         | 12.651           | 5.102            | 0.623 | 0.093            | 0              | 0.017            | 0.74 | 302.16 | 2.528 |
| 2018      | 0.135           | 6.016                         | 7.758            | 3.953            | 0.554 | 0.042            | 0              | 0.021            | 0.78 | 301.10 | 2.341 |
| 2019      | 0.105           | 6.230                         | 9.787            | 4.917            | 0.470 | 0.016            | 0              | 0.012            | 0.78 | 300.47 | 2.532 |
| 2020      | 0.216           | 4.750                         | 10.071           | 4.159            | 0.468 | 0.067            | 0              | 0.030            | 0.78 | 301.82 | 2.556 |
| Winter    |                 |                               |                  |                  |       |                  |                |                  |      |        |       |
| Year      | Na <sup>+</sup> | SO <sub>4</sub> <sup>2-</sup> | TNH <sub>3</sub> | TNO <sub>3</sub> | TCl   | Ca <sup>2+</sup> | K <sup>+</sup> | Mg <sup>2+</sup> | RH   | T      | pH    |
| 2010      | 0.020           | 8.678                         | 9.493            | 7.162            | 2.420 | 1.695            | 0              | 0.254            | 0.76 | 280.8  | 2.929 |
| 2012–2013 | 0               | 12.144                        | 15.003           | 15.556           | 1.959 | 0.295            | 0              | 0.730            | 0.73 | 278.64 | 3.711 |
| 2014      | 0.317           | 13.992                        | 15.531           | 17.354           | 2.644 | 0.242            | 0              | 0.087            | 0.70 | 279.55 | 3.658 |
| 2015      | 0.274           | 13.520                        | 15.732           | 19.371           | 2.418 | 0.240            | 0              | 0.070            | 0.72 | 279.84 | 3.652 |
| 2016      | 0.198           | 9.931                         | 11.625           | 14.094           | 1.639 | 0.128            | 0              | 0.036            | 0.71 | 280.80 | 3.464 |
| 2017      | 0.054           | 10.008                        | 12.344           | 17.244           | 1.842 | 0.064            | 0              | 0.024            | 0.72 | 278.86 | 3.558 |
| 2018      | 0.231           | 7.586                         | 9.510            | 12.921           | 1.482 | 0.138            | 0              | 0.036            | 0.75 | 279.86 | 3.470 |
| 2019      | 0.147           | 7.405                         | 10.412           | 12.965           | 1.268 | 0.109            | 0              | 0.030            | 0.74 | 281.75 | 3.473 |
| 2020      | 0.179           | 8.211                         | 10.146           | 12.669           | 1.344 | 0.108            | 0              | 0.037            | 0.73 | 281.45 | 3.407 |

**Table S4.** Effects of various driving factors on diurnal pH variations in the summer of 2010.

|                                                     | 5:00   | 10:00  | 14:00  | 20:00  | 24:00  |
|-----------------------------------------------------|--------|--------|--------|--------|--------|
| pH                                                  | 3.18   | 2.58   | 2.34   | 2.87   | 3.16   |
| RH (%)                                              | 83     | 72     | 64     | 75     | 80     |
| T (°C)                                              | 25.7   | 29.4   | 30.1   | 26.9   | 26.1   |
| T <sub>d</sub> (°C)                                 | 22.5   | 23.9   | 22.5   | 21.9   | 22.4   |
| SO <sub>4</sub> <sup>2-</sup> (µg m <sup>-3</sup> ) | 9.053  | 9.703  | 10.174 | 9.310  | 8.908  |
| NO <sub>3</sub> <sup>-</sup> (µg m <sup>-3</sup> )  | 7.644  | 5.452  | 4.362  | 4.960  | 6.471  |
| Ca <sup>2+</sup> (µg m <sup>-3</sup> )              | 0.692  | 0.806  | 0.811  | 0.873  | 0.824  |
| K <sup>+</sup> (µg m <sup>-3</sup> )                | 0.325  | 0.273  | 0.307  | 0.381  | 0.520  |
| NH <sub>x</sub> (µg m <sup>-3</sup> )               | 13.210 | 13.014 | 13.323 | 11.377 | 13.398 |
| N/S                                                 | 1.31   | 0.87   | 0.66   | 0.82   | 1.12   |
| ΔpH (T)                                             | /      | -0.31  | -0.4   | -0.12  | -0.07  |
| ΔpH (RH)                                            | /      | -0.30  | -0.52  | -0.16  | -0.05  |
| ΔpH (SO <sub>4</sub> <sup>2-</sup> )                | /      | -0.04  | -0.06  | -0.02  | 0.01   |
| ΔpH (NO <sub>3</sub> <sup>-</sup> )                 | /      | -0.05  | -0.10  | -0.02  | -0.04  |
| ΔpH (NH <sub>x</sub> )                              | /      | -0.01  | 0      | -0.11  | 0.01   |

T<sub>d</sub>: dew point temperature; ΔpH = pH<sub>actual</sub> - pH<sub>fixing the variable with the value at 5:00</sub>.**Table S5.** Effects of various driving factors on diurnal pH variations in the winter of 2010.

|                                                     | 5:00  | 10:00  | 14:00 | 20:00 | 24:00 |
|-----------------------------------------------------|-------|--------|-------|-------|-------|
| pH                                                  | 3.97  | 3.97   | 3.75  | 3.95  | 3.99  |
| RH (%)                                              | 84    | 76     | 65    | 76    | 81    |
| T (°C)                                              | 6.4   | 8.0    | 10.2  | 7.1   | 5.5   |
| T <sub>d</sub> (°C)                                 | 3.8   | 4.0    | 3.9   | 3.2   | 2.5   |
| SO <sub>4</sub> <sup>2-</sup> (µg m <sup>-3</sup> ) | 7.106 | 8.504  | 9.200 | 9.129 | 9.388 |
| NO <sub>3</sub> <sup>-</sup> (µg m <sup>-3</sup> )  | 4.952 | 6.185  | 6.223 | 6.310 | 6.962 |
| Ca <sup>2+</sup> (µg m <sup>-3</sup> )              | 1.665 | 1.804  | 1.704 | 1.63  | 1.647 |
| K <sup>+</sup> (µg m <sup>-3</sup> )                | 0.258 | 0.501  | 0.406 | 0.867 | 0.950 |
| NH <sub>x</sub> (µg m <sup>-3</sup> )               | 8.943 | 10.240 | 9.808 | 9.320 | 9.273 |
| N/S                                                 | 1.08  | 1.13   | 1.05  | 1.07  | 1.15  |
| ΔpH (T)                                             | /     | -0.08  | -0.18 | -0.03 | 0.04  |
| ΔpH (RH)                                            | /     | 0.05   | 0.04  | 0.05  | 0.02  |
| ΔpH (SO <sub>4</sub> <sup>2-</sup> )                | /     | -0.12  | -0.25 | -0.18 | -0.15 |
| ΔpH (NO <sub>3</sub> <sup>-</sup> )                 | /     | -0.03  | 0.02  | -0.04 | -0.07 |
| ΔpH (NH <sub>x</sub> )                              | /     | 0.10   | 0.07  | 0.03  | 0.03  |

T<sub>d</sub>: dew point temperature; ΔpH = pH<sub>actual</sub> - pH<sub>fixing the variable with the value at 5:00</sub>.**Table S6.** Effects of various driving factors on diurnal pH variations in the summer of 2020.

|                                                     | 5:00  | 10:00  | 14:00  | 20:00 | 24:00 |
|-----------------------------------------------------|-------|--------|--------|-------|-------|
| pH                                                  | 3.01  | 2.56   | 2.22   | 2.66  | 3.00  |
| RH (%)                                              | 89    | 74     | 68     | 82    | 88    |
| T (°C)                                              | 26.4  | 29.6   | 30.6   | 27.5  | 26.9  |
| T <sub>d</sub> (°C)                                 | 24.4  | 24.5   | 24.0   | 24.2  | 24.7  |
| SO <sub>4</sub> <sup>2-</sup> (µg m <sup>-3</sup> ) | 4.263 | 5.016  | 5.222  | 4.542 | 4.392 |
| NO <sub>3</sub> <sup>-</sup> (µg m <sup>-3</sup> )  | 3.592 | 3.401  | 2.922  | 3.036 | 4.037 |
| Ca <sup>2+</sup> (µg m <sup>-3</sup> )              | 0.059 | 0.087  | 0.066  | 0.076 | 0.036 |
| K <sup>+</sup> (µg m <sup>-3</sup> )                | 0.052 | 0.043  | 0.034  | 0.040 | 0.041 |
| NH <sub>x</sub> (µg m <sup>-3</sup> )               | 8.702 | 12.361 | 11.106 | 8.634 | 9.216 |

|                                          |      |       |       |       |       |
|------------------------------------------|------|-------|-------|-------|-------|
| N/S                                      | 1.30 | 1.05  | 0.87  | 1.04  | 1.42  |
| $\Delta\text{pH}$ (T)                    | /    | -0.22 | -0.27 | -0.07 | -0.02 |
| $\Delta\text{pH}$ (RH)                   | /    | -0.51 | -0.69 | -0.25 | -0.02 |
| $\Delta\text{pH}$ ( $\text{SO}_4^{2-}$ ) | /    | -0.05 | -0.05 | -0.03 | -0.01 |
| $\Delta\text{pH}$ ( $\text{NO}_3^-$ )    | /    | -0.04 | -0.01 | -0.02 | 0     |
| $\Delta\text{pH}$ (NHx)                  | /    | 0.22  | 0.16  | 0     | 0.02  |

Td: dew point temperature;  $\Delta\text{pH} = \text{pH}_{\text{actual}} - \text{pH}_{\text{fixing the variable with the value at 5:00}}$ .

**Table S7.** Effects of various driving factors on diurnal pH variations in the winter of 2020.

|                                             | 5:00   | 10:00  | 14:00  | 20:00  | 24:00  |
|---------------------------------------------|--------|--------|--------|--------|--------|
| pH                                          | 3.69   | 3.64   | 3.51   | 3.62   | 3.68   |
| RH (%)                                      | 77     | 69     | 66     | 72     | 74     |
| T (°C)                                      | 6.6    | 10.2   | 11.6   | 8.8    | 7.4    |
| T <sub>d</sub> (°C)                         | 2.8    | 4.9    | 5.4    | 4.1    | 3.1    |
| $\text{SO}_4^{2-}$ ( $\mu\text{g m}^{-3}$ ) | 4.949  | 6.180  | 5.716  | 4.899  | 5.359  |
| $\text{NO}_3^-$ ( $\mu\text{g m}^{-3}$ )    | 11.241 | 14.227 | 10.990 | 10.667 | 11.845 |
| $\text{Ca}^{2+}$ ( $\mu\text{g m}^{-3}$ )   | 0.179  | 0.216  | 0.144  | 0.183  | 0.189  |
| $\text{K}^+$ ( $\mu\text{g m}^{-3}$ )       | 0.254  | 0.242  | 0.216  | 0.272  | 0.310  |
| NHx ( $\mu\text{g m}^{-3}$ )                | 8.996  | 11.280 | 9.894  | 8.934  | 9.426  |
| N/S                                         | 3.52   | 3.56   | 2.98   | 3.37   | 3.42   |
| $\Delta\text{pH}$ (T)                       | /      | -0.18  | -0.25  | -0.11  | -0.04  |
| $\Delta\text{pH}$ (RH)                      | /      | 0.04   | 0.04   | 0.02   | 0.01   |
| $\Delta\text{pH}$ ( $\text{SO}_4^{2-}$ )    | /      | -0.11  | -0.07  | 0.01   | -0.04  |
| $\Delta\text{pH}$ ( $\text{NO}_3^-$ )       | /      | -0.03  | 0      | 0.01   | -0.01  |
| $\Delta\text{pH}$ (NHx)                     | /      | 0.24   | 0.08   | -0.01  | 0.05   |

Td: dew point temperature;  $\Delta\text{pH} = \text{pH}_{\text{actual}} - \text{pH}_{\text{fixing the variable with the value at 5:00}}$ .

**Table S8.** Effect of elevated TNO<sub>3</sub> on aerosol pH in different seasons.

| Case | Original input |    |                    |                  |                  | Model output     |                 |      | Sensitivity test |                  |                 |      |                   |
|------|----------------|----|--------------------|------------------|------------------|------------------|-----------------|------|------------------|------------------|-----------------|------|-------------------|
|      | T              | RH | $\text{SO}_4^{2-}$ | TNH <sub>3</sub> | TNO <sub>3</sub> | HNO <sub>3</sub> | $\text{NO}_3^-$ | pH   | TNO <sub>3</sub> | HNO <sub>3</sub> | $\text{NO}_3^-$ | pH   | $\Delta\text{pH}$ |
| 1    | 30.1           | 64 | 10.174             | 13.323           | 6.770            | 4.932            | 1.809           | 2.34 | 10.052           | 7.14             | 2.862           | 2.43 | 0.09              |
| 2    | 29.4           | 72 | 9.703              | 13.014           | 6.535            | 3.982            | 2.512           | 2.58 | 8.727            | 5.178            | 3.492           | 2.62 | 0.04              |
| 3    | 26.9           | 75 | 9.310              | 11.377           | 6.240            | 2.668            | 3.515           | 2.87 | 8.924            | 3.672            | 5.169           | 2.89 | 0.02              |
| 4    | 26.1           | 80 | 8.908              | 13.398           | 8.421            | 2.012            | 6.307           | 3.16 | 9.594            | 2.239            | 7.238           | 3.20 | 0.04              |
| 5    | 11.6           | 66 | 5.716              | 9.893            | 11.394           | 0.308            | 10.910          | 3.51 | 11.646           | 0.314            | 11.152          | 3.51 | 0                 |
| 6    | 10.2           | 69 | 6.180              | 11.280           | 11.753           | 0.169            | 11.400          | 3.67 | 14.739           | 0.210            | 14.298          | 3.64 | -0.03             |
| 7    | 8.8            | 72 | 4.899              | 8.934            | 11.137           | 0.161            | 10.802          | 3.62 | 11.711           | 0.170            | 11.358          | 3.61 | -0.01             |
| 8    | 7.4            | 74 | 5.359              | 9.426            | 11.664           | 0.102            | 11.379          | 3.69 | 12.267           | 0.108            | 11.966          | 3.68 | -0.01             |

case 1–4 in summer; case 5–8 in winter.
